1 **Chromosome-level genome assembly of Japanese chestnut (*Castanea crenata* Sieb. et Zucc.)**  
2 **reveals conserved chromosomal segments in woody rosids**

3

4 Kenta Shirasawa<sup>1\*</sup>, Sogo Nishio<sup>2</sup>, Shingo Terakami<sup>2</sup>, Roberto Botta<sup>3</sup>, Daniela Torello Marinoni<sup>3</sup>,  
5 Sachiko Isobe<sup>1</sup>

6

7 <sup>1</sup>Kazusa DNA Research Institute, Chiba 292-0818, Japan

8 <sup>2</sup>Institute of Fruit Tree and Tea Science, NARO, Ibaraki 305-8605, Japan

9 <sup>3</sup>Dipartimento di Scienze Agrarie, Forestali e Alimentari, Università di Torino, Grugliasco 10095,  
10 Italy

11

12 \*To whom correspondence should be addressed:

13 Kenta Shirasawa

14 2-6-7 Kazusa-Kamatari, Kisarazu, Chiba 292-0818, Japan

15 Tel.: +81 438 52 3935

16 Fax: +81 438 52 3934

17 E-mail: shirasaw@kazusa.or.jp

18

19 **Running title:** The genome sequence of Japanese chestnut

20

1    **Abstract**

2    Japanese chestnut (*Castanea crenata* Sieb. et Zucc.), unlike other *Castanea* species, is resistant to  
3    most diseases and wasps. However, genomic data of Japanese chestnut that could be used to  
4    determine its biotic stress resistance mechanisms have not been reported to date. In this study, we  
5    employed long-read sequencing and genetic mapping to generate genome sequences of Japanese  
6    chestnut at the chromosome level. Long reads (47.7 Gb; 71.6× genome coverage) were assembled  
7    into 781 contigs, with a total length of 721.2 Mb and a contig N50 length of 1.6 Mb. Genome  
8    sequences were anchored to the chestnut genetic map, comprising 14,973 single nucleotide  
9    polymorphisms (SNPs) and covering 1,807.8 cM map distance, to establish a chromosome-level  
10   genome assembly (683.8 Mb), with 69,980 potential protein-encoding genes and 425.5 Mb repetitive  
11   sequences. Furthermore, comparative genome structure analysis revealed that Japanese chestnut  
12   shares conserved chromosomal segments with woody plants, but not with herbaceous plants, of  
13   rosids. Overall, the genome sequence data of Japanese chestnut generated in this study is expected to  
14   enhance not only its genetics and genomics but also the evolutionary genomics of woody rosids.

15

16   **Keywords:** chestnut, genetic mapping, genome synteny, rosids, whole-genome sequence

17

18    **1. Introduction**

19    Chestnut is naturally distributed in temperate regions in the northern hemisphere, and plays a critical  
20    role in maintaining the landscape and forest ecosystem<sup>1</sup>. Seeds or nuts of chestnut trees provide  
21    important nutrition for animals as well as humans, while their wood is used as a source of timber and  
22    tannins. The genus *Castanea* ( $2n = 2x = 24$ ) includes four cultivated species: Japanese chestnut (*C.*  
23    *crenata* Sieb. et Zucc), American chestnut (*C. dentata* [Marshall] Borkh.), Chinese chestnut (*C.*  
24    *mollissima* Bl.), and European chestnut (*C. sativa* Mill.). Japanese chestnut is commercially

1 cultivated in Japan and Korea, while the remaining three species are commercially grown in the  
2 USA, China, and Europe, respectively. Seguin chestnut (*C. seguinii* Dode.) and Henry chestnut (*C.*  
3 *henryi* Rehd. et Wils.), found in China, and Allegheny chinkapin (*C. pumila* Mill.), which grows in  
4 the USA, are recognized as wild species.

5 In the early 19th century, American chestnut was devastated by chestnut blight, caused by an  
6 exotic pathogen, namely, *Cryphonectria parasitica*<sup>2</sup>. European chestnut has also been damaged by  
7 chestnut blight and ink disease, caused by *C. parasitica* and *Phytophthora cinnamomi*, respectively<sup>3</sup>.  
8 In addition, chestnut gall wasp (*Dryocosmus kuriphilus*) was accidentally introduced into Europe,  
9 resulting in great damage to chestnut production<sup>4</sup>. Because Japanese chestnut lines as well as  
10 Chinese chestnut are generally resistant to diseases and wasps, resistance genes have been  
11 transferred from Japanese chestnut to susceptible species in several chestnut breeding programs<sup>3</sup>.

12 Genome sequence information is useful for not only accelerating breeding programs but also  
13 understanding the phylogenetic relationships and revealing the evolutionary history of a given  
14 species through comparative genome structure analysis. To the best of our knowledge, genome  
15 sequences of three Chinese chestnut lines and one Henry chestnut line have been reported to date<sup>5-8</sup>.  
16 However, whole-genome sequence of Japanese chestnut is not yet publicly available. Advances in  
17 long-read sequencing technology have enabled the construction of a mega-base-scale genome  
18 assembly of haploid, diploid, and polyploid species<sup>9</sup>. Long contig sequences generated by long-read  
19 sequencing could be further concatenated at the chromosome level with high-throughput  
20 chromosome conformation analyses, optical mapping, and/or genetic mapping to establish  
21 pseudomolecule sequences<sup>10</sup>. In this study, using long-read sequencing and genetic mapping, we  
22 established chromosome-level pseudomolecule sequences of the Japanese chestnut variety ‘Ginyose’,  
23 which has contributed to the spread of chestnut cultivation in Japan owing to its large nut size and  
24 excellent appearance. Despite its long history of cultivation that dates back to the 17th century,

1 'Ginyose' is still a major cultivated variety in Japan, accounting for approximately 15% of the  
2 national chestnut production. Genetic structure and parentage analysis shows that 'Ginyose' is the  
3 predecessor of many Japanese cultivars<sup>11</sup>.

4

## 5 **2. Materials and methods**

### 6 2.1 Plant materials and DNA extraction

7 A tree of the Japanese chestnut cultivar 'Ginyose' planted at the Institute of Fruit Tree and Tea  
8 Science, NARO (Tsukuba, Japan) was used for genome sequencing. Genomic DNA was extracted  
9 from tree leaves with Genomic-tips (Qiagen, Hilden, Germany).

10

### 11 2.2 Genome sequencing and analysis

12 Software tools used for data analyses are listed in Supplementary Table S1. Genomic DNA libraries  
13 for short- and long-read sequencing were generated with the TruSeq DNA PCR-Free Kit (Illumina,  
14 San Diego, CA, USA) and the SMRTbell Express Template Prep Kit 2.0 (PacBio, Menlo Park, CA,  
15 USA), respectively. Short-read sequence data were obtained using the HiSeq2000 platform  
16 (Illumina). Genome size was estimated using Jellyfish after removing adaptor sequences  
17 (AGATCGGAAGAGC) and reads obtained from organelle genomes (GenBank accession numbers:  
18 HQ336406 and MN199236). Long-read sequence data were obtained using the Sequel system  
19 (PacBio), and primary contigs and alternate contigs, which were generated from one allele and the  
20 other, respectively, of diploid genomes, were assembled with Falcon. Then, haplotype sequences  
21 were resolved to generate haplotigs with Falcon\_Unzip. Sequence errors in the contigs were  
22 corrected twice using long reads with ARROW, and potential haplotype duplications in the primary  
23 contigs were removed with Purge\_Dups. Contig sequences potentially contaminated from organelle  
24 genomes (GenBank accession numbers: HQ336406 and MN199236), which showed sequence

1 similarity of > 90% with Minimap2, were removed. Assembly completeness was evaluated with the  
2 embryophyta\_odb10 data using Benchmarking Universal Single-Copy Orthologs (BUSCO).

3

### 4 2.3 Genetic map-based chromosome-level sequence construction

5 Reads obtained by double digest restriction site-associated DNA sequencing (ddRAD-Seq) of an F1  
6 mapping population ( $n = 185$ ), derived from a cross between 'Bouche de Bétizac' (*C. sativa* × *C.*  
7 *crenata*) and 'Madonna' (*C. sativa*)<sup>4</sup>, were mapped onto the primary contigs as a reference using  
8 Bowtie2, and sequence variants were detected with BCFtools. High-confidence single nucleotide  
9 polymorphisms (SNPs) were selected with VCFtools (parameters of --minDP 5 --minQ 999  
10 --max-missing 0.5 --maf 0.2 --max-maf 0.8) and subjected to linkage analysis with Lep-Map3. The  
11 nomenclature and direction of the linkage groups were based on the map reported by Torello  
12 Marinoni et al.<sup>4</sup> To construct pseudomolecule sequences at the chromosome level, primary contigs  
13 were assigned to the resultant genetic map with ALLMAPS.

14

### 15 2.4 Repeat sequence analysis

16 Repetitive sequences in the assembly were identified with RepeatMasker using repeat sequences  
17 registered in Repbase and a de novo repeat library built with RepeatModeler. Repeat elements were  
18 classified into nine types with RepeatMasker: short interspersed nuclear elements (SINEs), long  
19 interspersed nuclear elements (LINEs), long terminal repeat (LTR) elements, DNA elements, small  
20 RNA, satellites, simple repeats, low complexity repeats, and unclassified.

21

### 22 2.5 Gene prediction and annotation

23 Protein-coding genes were predicted using a MAKER pipeline, based on peptide sequences  
24 predicted in the *C. mollissima* genome (GWHANWH00000000,  $n = 33,597$ )<sup>7</sup> and transcriptome

1 sequences of three *Castanea* species<sup>2</sup>, *C. crenata* (cci\_ccn,  $n = 13,451$ ), *C. dentata* (AC454\_v3,  $n =$   
2 45,288), and *C. sativa* (csi\_csn,  $n = 12,771$ ), released in the Hardwood Genomics Project  
3 (<https://doi.org/10.25504/FAIRsharing.srgkaf>). Short gene sequences (< 300 bp), genes in repeat  
4 sequences, and genes with annotation edit distance (AED) > 0.5, which is proposed as a threshold  
5 for good annotations in the MAKER protocol, were removed to facilitate the selection of  
6 high-confidence genes. Functional annotation of the predicted genes was performed with  
7 Hayai-Annotation Plants.

8

### 9 2.6 Comparative genome structure analysis

10 The genome structure of Japanese chestnut cultivar ‘Ginyose’ was aligned to the genome sequence  
11 of Chinese chestnut (*C. mollissima*), as a reference, with Unimap. In addition, publicly available  
12 chromosome-level sequences of 114 plants<sup>10</sup>, which, in accordance with Angiosperm Phylogeny  
13 Group (APG) classification IV<sup>12</sup>, consisted of 20 monocots, 93 eudicots (including 66 rosids and 23  
14 asterids), and one member of Nymphaea, were also employed as references. Dot-plot charts based on  
15 the alignments were drawn with D-Genies.

16

## 17 3. Results and data description

### 18 3.1 Genome sequence and assembly

19 In accordance with  $k$ -mer frequency analysis of 63.3 Gb short reads, the genome size of *C. crenata*  
20 was estimated at 665.9 Mb (Figure 1). A total of 2.7 million long reads (47.7 Gb, 71.6x genome  
21 coverage, N50 = 29.8 kb) obtained from four single-molecule real-time (SMRT) cells were  
22 assembled into two haplotype-resolved sequences: primary contigs and haplotigs. The resultant  
23 assemblies of primary contigs (CCR\_r1.0) and haplotigs (CCR\_r1.0.haplotigs) consisted of 781 and  
24 3,355 sequences, respectively (Table 1). Total lengths of primary contigs (CCR\_r1.0) and haplotigs

1 (CCR\_r1.0.haplotigs) were 721 Mb (N50 = 1.6 Mb) and 629.2 Mb (N50 = 275.8 kb), respectively.  
2 The completeness of primary contigs indicated that 96.6% of sequences were complete BUSCOs  
3 (Table 1).

4

### 5 3.2 Pseudomolecule sequence construction

6 To construct a genetic map of *C. crenata*, we used ddRAD-Seq data of a mapping population  
7 reported previously<sup>4</sup>. A total of 903 million high-quality ddRAD-Seq reads obtained from the  
8 mapping population and parental lines were mapped onto the primary contigs, with an average  
9 mapping rate of 86.5%. SNPs were detected and filtered. Consequently, 15,364 high-quality SNPs  
10 were identified, of which 14,973 were grouped into 12 linkage groups, which corresponds to the  
11 number of chromosomes in *C. crenata*. Then, SNP order and the map distance between adjacent  
12 SNPs were calculated (Table 2, Supplementary Table S2). The nomenclature of linkage groups was  
13 based on our previous study<sup>4</sup>. A total of 575 primary contigs (683.8 Mb) were assigned to this  
14 genetic map and connected with 100 Ns to establish pseudomolecule sequences, while the remaining  
15 206 contigs (37.4 Mb) were not assigned to any linkage groups (Table 2).

16

### 17 3.3 Repeat sequence analysis and gene prediction

18 Repetitive sequences (425.5 Mb) accounted for 59.0% of the Japanese chestnut genome assembly  
19 (Table 3). LTR retroelements were the most abundant repeat sequences (172.7 Mb, 24.0%), followed  
20 by unclassified repeat sequences (154.0 Mb, 21.3%), i.e., those unavailable in public databases.

21 A total of 195,950 potential protein-coding sequences were identified in the Japanese chestnut  
22 genome assembly, based on *ab initio* prediction and amino acid sequence homology among four  
23 *Castanea* species: *C. crenata*, *C. dentata*, *C. mollissima*, and *C. sativa*. Subsequently, protein-coding  
24 sequences were filtered to remove 89,194 genes with AED > 0.5, 13,389 protein-coding sequences

1 in repeat sequences, 23,386 short sequences (< 300 bp), and one redundant sequence. Finally, 69,980  
2 sequences were identified as high-confidence genes, including 83.6% complete BUSCOs. Functional  
3 annotation analysis showed that of the 69,980 predicted genes, 4,370, 7,803, and 5,219 sequences  
4 were assigned to Gene Ontology slim terms in the biological process, cellular component, and  
5 molecular function categories, respectively, and 1,267 genes had enzyme commission numbers  
6 (Supplementary Table S3).

7 Next, peptide sequences of *C. mollissima* and transcriptome sequences of *C. crenata*, *C. dentata*,  
8 and *C. sativa* were aligned to the genome sequence of Japanese chestnut obtained in this study. A  
9 total of 24,561 genes predicted in the Japanese chestnut genome sequence were covered by  
10 transcriptome sequences from at least one of the three *Castanea* species (Figure 2), while the  
11 remaining 28,773 genes did not correspond to transcriptome sequences from any *Castanea* species.

12

### 13 3.4 Comparative genome structure analysis

14 The genome structure of Japanese chestnut was well conserved with that of Chinese chestnut (Figure  
15 3), as expected. Interestingly, the *C. crenata* genome showed local synteny with the genomes of at  
16 least 14 plant species (*Acer yangbiense*, *Citrus sinensis*, *Fragaria vesca*, *Malus × domestica*,  
17 *Manihot esculenta*, *Populus trichocarpa*, *Prunus avium*, *Prunus dulcis*, *Prunus mume*, *Prunus*  
18 *persica*, *Pyrus betulifolia*, *Theobroma cacao*, *Vitis vinifera*, and *Ziziphus jujuba*) (Figure 3), all of  
19 which represent woody tree species belonging to Malpighiales, Malvales, Rosales, Sapindales, and  
20 Vitales in rosids<sup>12</sup>.

21

## 22 4. Conclusion and future perspectives

23 Here, we report the genome sequence of Japanese chestnut for the first time. Due to the  
24 long-sequencing technology and genetic mapping with high-density SNP loci identified using



1 previously published ddRAD-Seq data, 683.8 Mb (94.8%) of the assembled contig sequences (721.2  
2 Mb) were assigned to chromosomes for establishing pseudomolecule sequences for Japanese  
3 chestnut (Table 2). Genes predicted based on the pseudomolecule sequences of Japanese chestnut  
4 included 96.9% of the core gene set of Embryophyta (Table 2), suggesting that most of all genes  
5 were represented in the Japanese chestnut genome assembly. The coverage of pseudomolecule  
6 sequences in Japanese chestnut (683.8 Mb) was comparable to that in Chinese chestnut (12  
7 pseudomolecule sequences, 667 Mb). Therefore, the chromosome-level genome assembly of  
8 Japanese chestnut generated in this study could be used as a standard reference for genetics,  
9 genomics, and breeding of Japanese chestnut and its relatives.

10 Comparative genome structure analysis showed that the genome structure of Japanese chestnut  
11 was quite similar to that of Chinese chestnut (Figure 3). This result suggests that agronomically  
12 important genetic loci controlling nut weight and harvesting time<sup>13-15</sup> could be transferred from  
13 Chinese chestnut to Japanese chestnut and vice versa. Chromosomal segments in the Japanese  
14 chestnut genome shared synteny with the peach genome<sup>16</sup> (Figure 3); this relationship has also been  
15 reported in Chinese chestnut. More interestingly, regions in the Japanese chestnut genome showed  
16 sequence similarity with the genomes of Malpighiales, Malvales, Rosales, Sapindales, and Vitales  
17 belonging to woody rosids (Figure 3), but not with Brassicales, Cucurbitales, and Fabales  
18 belonging to herbaceous rosids. Genome structure conservation among rosids, e.g., Rosales (sweet  
19 cherry, apple, and, Japanese fig) and Malvales (cacao), have been suggested in our previous  
20 investigation of 114 plant species<sup>10</sup>. This result suggests that woody members of rosids share a  
21 closely related genome structure with each other, although this relationship contradicts that  
22 suggested by the APG classification IV<sup>12</sup>. Indeed, none of the plant species in Cucurbitales, which is  
23 suggested to be the closest order to Fagales according to APG IV<sup>12</sup>, showed genome structure  
24 similarity to Japanese chestnut. Thus, comparative genome structure analysis provides new insights

1 into the evolutionary history of angiosperm.

2 The genome sequence data generated in this study would enhance the genetics and genomics of  
3 Japanese chestnut, in which classical molecular markers, such as simple sequence repeats,  
4 previously played a key role in 1) the identification of genetic loci affecting agronomically important  
5 traits<sup>4,15,17</sup>; 2) chestnut breeding programs with marker-assisted selection<sup>18</sup>; and 3) the assessment of  
6 the genetic structure of cultivated and wild chestnut populations<sup>19</sup>. Furthermore, the highly  
7 conserved genome sequence and structure of woody members of rosids might help us better  
8 understand their evolutionary history and facilitate the identification of common genetic mechanisms  
9 affecting agronomic traits across various orders, families, species, and genera.

10

#### 11 **Acknowledgments**

12 We thank Y. Kishida, C. Minami, H. Tsuruoka, and A. Watanabe (Kazusa DNA Research Institute)  
13 for providing technical assistance. This work was supported in part by the JSPS KAKENHI  
14 (20K15524) and the Kazusa DNA Research Institute Foundation.

15

#### 16 **Data availability**

17 Raw sequence reads were deposited into the Sequence Read Archive (SRA) database of the DNA  
18 Data Bank of Japan (DDBJ) under accession number DRA012289. Assembled sequences are  
19 available at DDBJ under accession numbers BPMU01000001–BPMU01000781. Genome  
20 information generated in this study is available at Plant GARDEN (<https://plantgarden.jp>).

21

#### 22 **Conflict of interest**

23 None declared.

24

- 1 **Supplementary data**
- 2 **Supplementary Table S1** Software tools used for genome assembly and gene prediction.
- 3 **Supplementary Table S2** Genetic map and anchored genome sequences.
- 4 **Supplementary Table S3** IDs and annotations of predicted genes.
- 5

## 1   **References**

- 2   1.    Bounous, G. and Marinoni, D. T. 2004, Chestnut: Botany, Horticulture, and  
3       Utilization. *Horticultural Reviews*, pp. 291-347.
- 4   2.    Barakat, A., DiLoreto, D. S., Zhang, Y., et al. 2009, Comparison of the  
5       transcriptomes of American chestnut (*Castanea dentata*) and Chinese chestnut  
6       (*Castanea mollissima*) in response to the chestnut blight infection. *BMC Plant Biol*,  
7       **9**, 51.
- 8   3.    Pereira-Lorenzo, S., Ballester, A., Corredoira, E., et al. 2012, Chestnut. In:  
9       Badenes, M. L. and Byrne, D. H. (eds), *Fruit Breeding*, Springer US, Boston, MA,  
10      pp. 729-769.
- 11  4.    Torello Marinoni, D., Nishio, S., Valentini, N., et al. 2020, Development of  
12      High-Density Genetic Linkage Maps and Identification of Loci for Chestnut Gall  
13      Wasp Resistance in *Castanea* spp. *Plants (Basel)*, **9**.
- 14  5.    Staton, M., Addo-Quaye, C., Cannon, N., et al. 2020, A reference genome assembly  
15      and adaptive trait analysis of *Castanea mollissima* ‘Vanuxem,’ a source of  
16      resistance to chestnut blight in restoration breeding. *Tree Genetics & Genomes*,  
17      **16**.
- 18  6.    Sun, Y., Lu, Z., Zhu, X. and Ma, H. 2020, Genomic basis of homoploid hybrid  
19      speciation within chestnut trees. *Nat Commun*, **11**, 3375.
- 20  7.    Wang, J., Tian, S., Sun, X., et al. 2020, Construction of Pseudomolecules for the  
21      Chinese Chestnut (*Castanea mollissima*) Genome. *G3 (Bethesda)*, **10**, 3565-3574.
- 22  8.    Xing, Y., Liu, Y., Zhang, Q., et al. 2019, Hybrid de novo genome assembly of Chinese  
23      chestnut (*Castanea mollissima*). *Gigascience*, **8**.
- 24  9.    Sato, K., Abe, F., Mascher, M., et al. 2021, Chromosome-scale genome assembly of  
25      the transformation-amenable common wheat cultivar ‘Fielder’ . *DNA Research*.
- 26  10.   Shirasawa, K., Harada, D., Hirakawa, H., Isobe, S. and Kole, C. 2021,  
27      Chromosome-level *de novo* genome assemblies of over 100 plant species. *Breeding*  
28      *Science*, **71**, 117-124.
- 29  11.   Nishio, S., Iketani, H., Fujii, H., et al. 2014, Use of population structure and  
30      parentage analyses to elucidate the spread of native cultivars of Japanese chestnut.  
31      *Tree Genetics & Genomes*, **10**, 1171-1180.
- 32  12.   The Angiosperm Phylogeny Group 2016, An update of the Angiosperm Phylogeny Group  
33      classification for the orders and families of flowering plants: APG IV. *Botanical*  
34      *Journal of the Linnean Society*, **181**, 1-20.
- 35  13.   Ji, F., Wei, W., Liu, Y., et al. 2018, Construction of a SNP-Based High-Density  
36      Genetic Map Using Genotyping by Sequencing (GBS) and QTL Analysis of Nut Traits

- 1           in Chinese Chestnut (*Castanea mollissima* Blume). *Front Plant Sci*, **9**, 816.
- 2 14. Nishio, S., Hayashi, T., Yamamoto, T., et al. 2018, Bayesian genome-wide  
3 association study of nut traits in Japanese chestnut. *Molecular Breeding*, **38**.
- 4 15. Nishio, S., Terakami, S., Matsumoto, T., et al. 2018, Identification of QTLs for  
5 Agronomic Traits in the Japanese Chestnut (*Castanea crenata* Sieb. et Zucc.)  
6 Breeding. *The Horticulture Journal*, **87**, 43-54.
- 7 16. Kubisiak, T. L., Nelson, C. D., Staton, M. E., et al. 2012, A transcriptome-based  
8 genetic map of Chinese chestnut (*Castanea mollissima*) and identification of  
9 regions of segmental homology with peach (*Prunus persica*). *Tree Genetics & Genomes*,  
10 **9**, 557-571.
- 11 17. Nishio, S., Takada, N., Yamamoto, T., et al. 2013, Mapping and pedigree analysis  
12 of the gene that controls the easy peel pellicle trait in Japanese chestnut  
13 (*Castanea crenata* Sieb. et Zucc.). *Tree Genetics & Genomes*, **9**, 723-730.
- 14 18. Bernatzky, R. and Mulcahy, D. L. 1992, Marker-aided selection in a backcross  
15 breeding program for resistance to chestnut blight in the American chestnut.  
16 *Canadian Journal of Forest Research*, **22**, 1031-1035.
- 17 19. Nishio, S., Takada, N., Terakami, S., et al. 2021, Genetic structure analysis of  
18 cultivated and wild chestnut populations reveals gene flow from cultivars to  
19 natural stands. *Sci Rep*, **11**, 240.
- 20

1 **Table 1** Statistics of the contig sequences of Japanese chestnut

---

|                             | CCR_r1.0    | CCR_r1.0.haplotig |
|-----------------------------|-------------|-------------------|
| Total contig size (bases)   | 721,168,657 | 629,166,897       |
| Number of contigs           | 781         | 3,355             |
| Contig N50 length (bases)   | 1,595,543   | 275,768           |
| Longest contig size (bases) | 13,981,633  | 1,688,135         |
| Gap (bases)                 | 0           | 0                 |
| Complete BUSCOs             | 96.6        | n.a.              |
| Single-copy BUSCOs          | 91.9        | n.a.              |
| Duplicated BUSCOs           | 4.7         | n.a.              |
| Fragmented BUSCOs           | 0.9         | n.a.              |
| Missing BUSCOs              | 2.5         | n.a.              |
| #Genes                      | 69,980      | n.a.              |

---

2 n.a.: not analyzed.

3

1 **Table 2** Statistics of Japanese chestnut pseudomolecule sequences (CCR\_r1.0.pmol)

| Linkage group | No. of SNPs   | Genetic distance (cM) | No. of bins  | No. of contigs | %           | Total length (bp)  | %           |
|---------------|---------------|-----------------------|--------------|----------------|-------------|--------------------|-------------|
| CCR1.0A       | 2,483         | 173.7                 | 284          | 59             | 7.6         | 89,228,932         | 12.4        |
| CCR1.0B       | 1,514         | 172.2                 | 202          | 53             | 6.8         | 53,118,407         | 7.4         |
| CCR1.0C       | 1,232         | 152.6                 | 204          | 44             | 5.6         | 56,655,719         | 7.9         |
| CCR1.0D       | 1,083         | 137.5                 | 161          | 57             | 7.3         | 52,875,950         | 7.3         |
| CCR1.0E       | 1,342         | 165.2                 | 228          | 61             | 7.8         | 71,160,265         | 9.9         |
| CCR1.0F       | 1,339         | 132.3                 | 154          | 42             | 5.4         | 61,824,531         | 8.6         |
| CCR1.0G       | 924           | 137.2                 | 153          | 44             | 5.6         | 44,683,286         | 6.2         |
| CCR1.0H       | 816           | 138.9                 | 170          | 34             | 4.4         | 53,252,922         | 7.4         |
| CCR1.0I       | 1,199         | 157.9                 | 168          | 42             | 5.4         | 45,426,588         | 6.3         |
| CCR1.0J       | 1,036         | 148                   | 157          | 32             | 4.1         | 40,655,448         | 5.6         |
| CCR1.0K       | 1,026         | 144.9                 | 196          | 62             | 7.9         | 67,434,223         | 9.4         |
| CCR1.0L       | 979           | 147.4                 | 140          | 45             | 5.8         | 47,439,869         | 6.6         |
| <b>Total</b>  | <b>14,973</b> | <b>1,808</b>          | <b>2,217</b> | <b>575</b>     | <b>73.6</b> | <b>683,756,140</b> | <b>94.8</b> |

2

1 **Table 3** Repetitive sequences in the Japanese chestnut genome

| Repeat type     | No. of elements | Physical length |      |
|-----------------|-----------------|-----------------|------|
|                 |                 | (bp)            | %    |
| SINEs           | 3,222           | 349,743         | 0.0  |
| LINEs           | 58,824          | 28,244,400      | 3.9  |
| LTR elements    | 173,629         | 172,741,932     | 24.0 |
| DNA transposons | 206,227         | 47,812,722      | 6.6  |
| Unclassified    | 672,305         | 153,965,018     | 21.3 |
| Small RNA       | 1,548           | 851,212         | 0.1  |
| Satellites      | 1,888           | 1,522,847       | 0.2  |
| Simple repeats  | 308,508         | 12,661,150      | 1.8  |
| Low complexity  | 43,949          | 2,095,795       | 0.3  |

2



1 **Figure legends**

2 **Figure 1** Estimation of the genome size of Japanese chestnut (*Castanea crenata*), based on *k*-mer  
3 analysis ( $k = 17$ ) with the given multiplicity values.

4

5 **Figure 2** Number of genes in the genomes of Japanese chestnut and Chinese chestnut supported by  
6 members of the Rosaceae family.

7 Predicted genes in the genomes of Japanese chestnut (CCR\_r1.0) and Chinese chestnut  
8 (GWHANWH000000000), and the transcriptome sequences of American chestnut (AC454\_v3),  
9 European chestnut (csi\_csn), and Japanese chestnut (cci\_ccn).

10

11 **Figure 3** Comparative analysis of the genome sequence and structure of Japanese chestnut and other  
12 woody members of rosids.

13 Dots indicate genome sequence and structure similarity among *Castanea mollissima*, *Acer*  
14 *yangbiense*, *Citrus sinensis*, *Fragaria vesca*, *Malus × domestica*, *Manihot esculenta*, *Populus*  
15 *trichocarpa*, *Prunus persica*, *Pyrus betulifolia*, *Theobroma cacao*, *Vitis vinifera*, and *Ziziphus jujuba*.

16

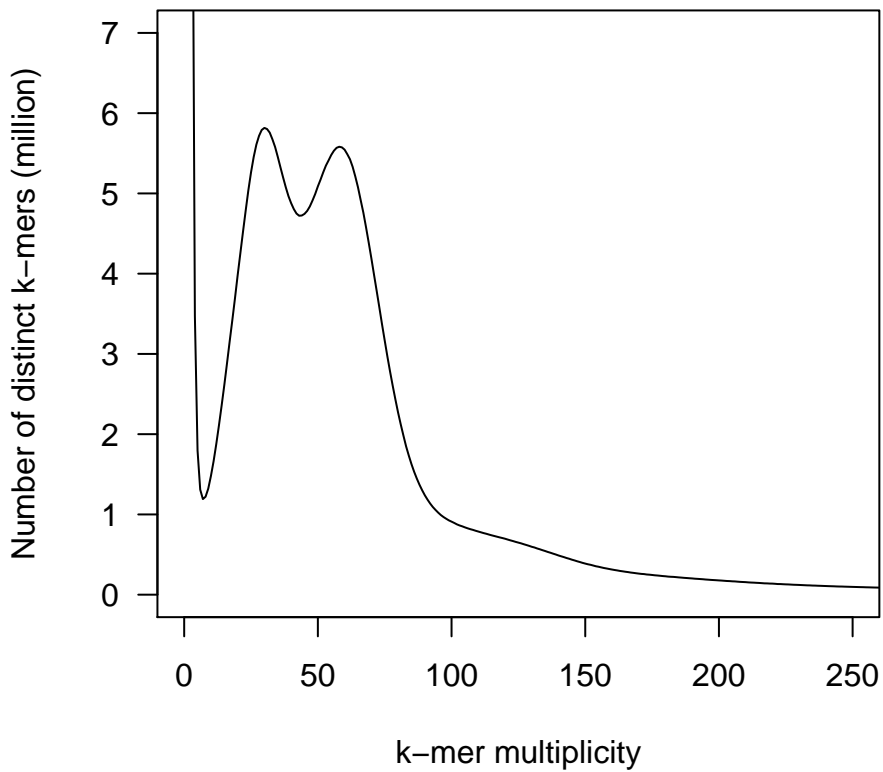

***C. crenata* (CCR\_r1.0)**

***C. mollissima*  
(GWHANWH00000000)**

***C. sativa*  
(csi\_csn)**

***C. dentata*  
(AC454\_v3)**

***C. renata*  
(cci\_ccn)**

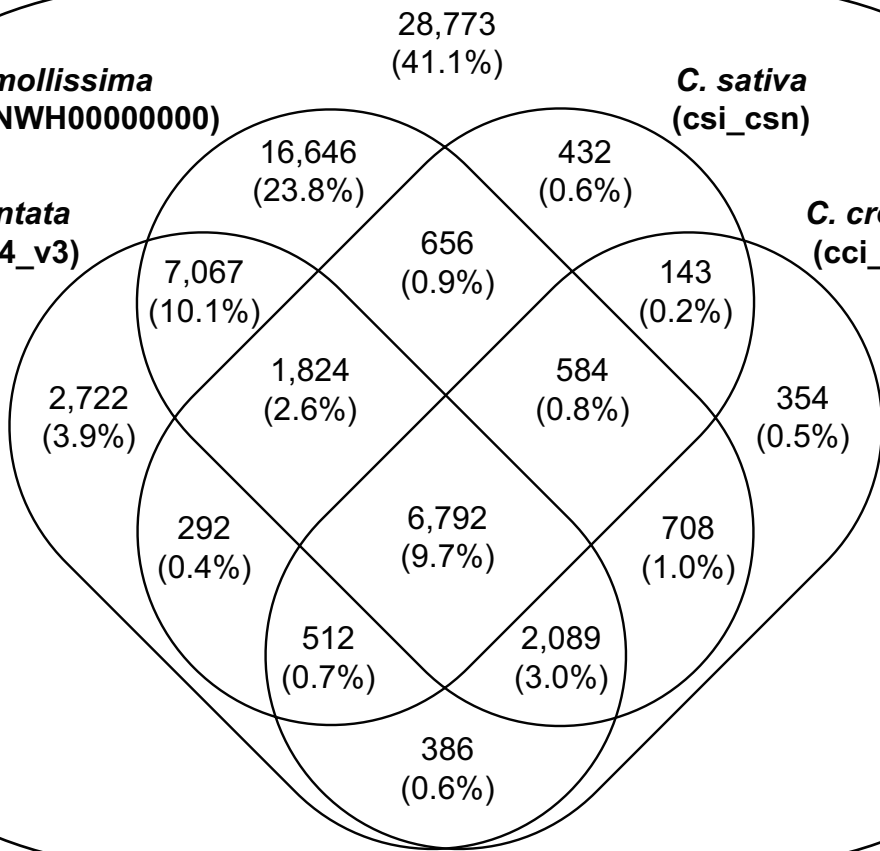

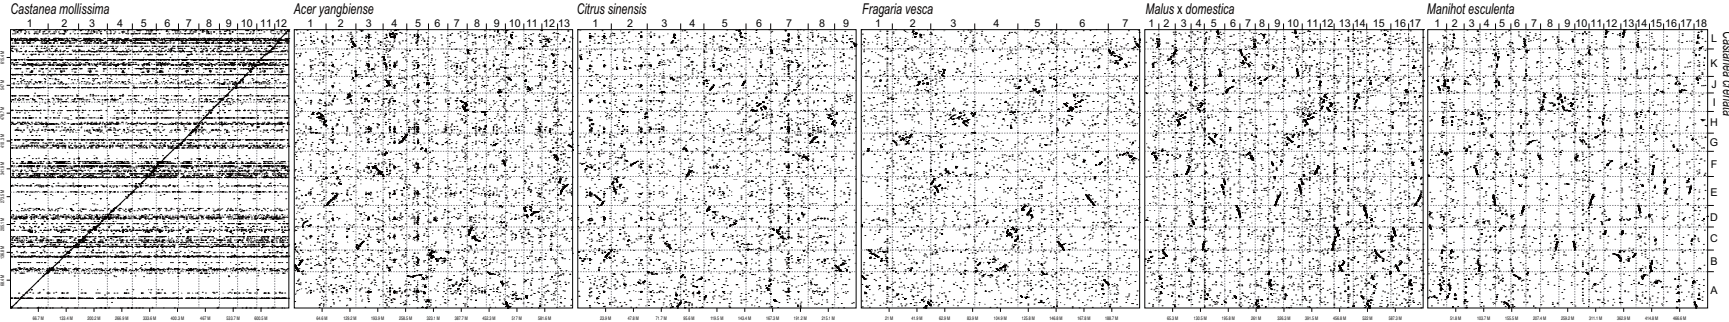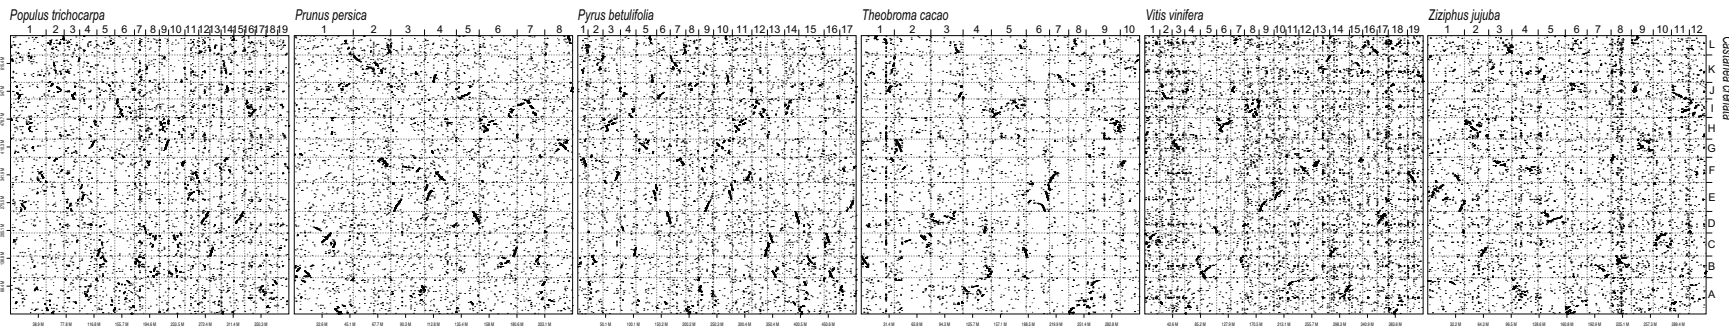

Source: http://biorxiv.org/content/10.1101/2021.07.29.454274v1.full.pdf
